# Supplementary material
Source: PubMed Central journal article supplement (PMC1190240)

## Supplemental materials

Supplemental FIG. S1. Overexpression of *FEN-1* enhanced I-*SceI*-induced gene conversion in wild-type cells. The recombination frequency in the SCneo reporter construct is shown as the number of G418-resistant colonies derived from  $10^7$  cells transfected with the indicated plasmid. Expression vector of chicken *FEN-1* was cotransfected with the I-*SceI* expression plasmid into wild-type cells. The experiments were done more than four times.

Supplemental FIG. S2. Generation of *XPG*<sup>-/-</sup> DT40 cells. (A) Schematic representation of targeted disruption of the chicken *XPG* gene. The chicken *XPG* locus, the two targeting constructs and the resulting targeted locus are shown. The black boxes indicate the exons of the *XPG* gene. The triangles flanking the blasticidin S resistance (*bsr*) and histidinol dehydrogenase (*hisD*) genes designate the loxP sequences. The italic B denotes a *Bam*HI site. The figure is not drawn to scale. (B) Southern blot analysis of targeted cells. *Bam*HI-digested genomic DNA of wild-type (+/+), heterozygous (+/-) and homozygous mutant (-/-) cells was hybridized with the probe shown in (A).

Supplemental table S1. Primers used in I-*SceI*-induced gene targeting assay

| Name       | Sequence                                                                           |
|------------|------------------------------------------------------------------------------------|
| NeoS       | GGATCGGCCATTGAACAAGATGGATTGCAC                                                     |
| NeoE       | CCTCAGAAGAAGCTCGTCAAGAAGGCGATAG                                                    |
| Mneo-1 (+) | ATGCCCCGACGGCGAGGATCTCGTCGTGACCAGGGATAACAGG<br>GTAATCGATGCCTGCTTGCCGAATATCATGGTGGA |
| Mneo-1 (-) | TCCACCATGATATTCGGCAAGCAGGCATCGATTACCCTGTTATC<br>CCTGGTCACGACGAGATCCTCGCCGTCGGGCAT  |
| Mneo-2 (+) | ATGCCCCGACGGCGAGGATCTCGTCGTGACCAGGGACAATAGG<br>GTAATCGATGCCTGCTTGCCGAATATCATGGTGGA |
| Mneo-2 (-) | TCCACCATGATATTCGGCAAGCAGGCATCGATTACCCTATTGTC<br>CCTGGTCACGACGAGATCCTCGCCGTCGGGCAT  |
| Mneo-3 (+) | ATGCCCCGACGGCGAGGATCTCGTCGTGACCAGAGACAATAGA<br>GTAATCGATGCCTGCTTGCCGAATATCATGGTGGA |
| Mneo-3 (-) | TCCACCATGATATTCGGCAAGCAGGCATCGATTACTCTATTGTC<br>TCTGGTCACGACGAGATCCTCGCCGTCGGGCAT  |
| Mneo-4 (+) | ATGCCCCGACGGCGAGGATCTCGTCGTGACCAGGGTAATCGATG<br>CCTGCTTGCCGAATATCATGGTGGA          |
| Mneo-4 (-) | TCCACCATGATATTCGGCAAGCAGGCATCGATTACCCTGGTCA<br>CGACGAGATCCTCGCCGTCGGGCAT           |
| Mneo-5 (+) | ATGCCCCGACGGCGAGGATCTCGTCGTGACCATCGATGCCTGCT<br>TGCCGAATATCATGGTGGA                |
| Mneo-5 (-) | TCCACCATGATATTCGGCAAGCAGGCATCGATGGTCACGACGA<br>GATCCTCGCCGTCGGGCAT                 |
| Mneo-6 (+) | ATGCCCCGACGGCGAGGATCTCGTCGTGACCGATGCCTGCTTGC<br>CGAATATCATGGTGGA                   |
| Mneo-6 (-) | TCCACCATGATATTCGGCAAGCAGGCATCGGTACGACGAGAT<br>CCTCGCCGTCGGGCAT                     |

Supplemental table S2. The gene targeting efficiencies at various loci in *FEN-1*<sup>-/-</sup> cells.

|                                            | <i>OVA</i>    | <i>RAD54</i> | <i>CENP-H</i> | <i>β-ACTIN</i> |
|--------------------------------------------|---------------|--------------|---------------|----------------|
| Wild-type                                  | 29/41 (70.7%) | 8/40 (20%)   | 40/48 (83.3%) | 26/63 (41%)    |
| <i>FEN-1</i> <sup>-/-</sup>                | 19/72 (26.4%) | 2/51 (3.92%) | 24/47 (51.1%) | 37/87 (43%)    |
| <i>FEN-1</i> <sup>-/-</sup> + <i>FEN-1</i> | 15/34 (44.1%) | 5/46 (10.9%) | N.D.          | N.D.           |

Shown are the number of targeted clones over the number of clones analyzed. N.D., not determined.

S1

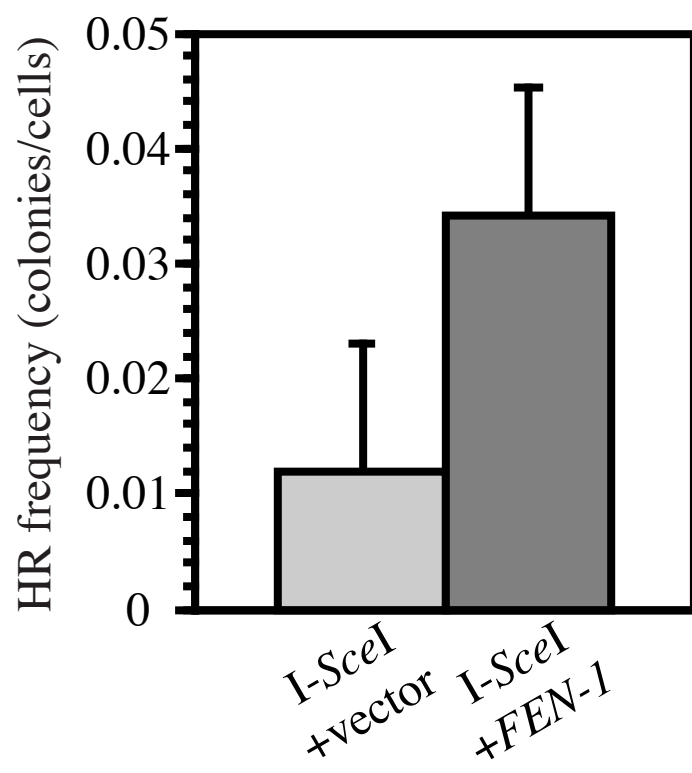

# S2

## A

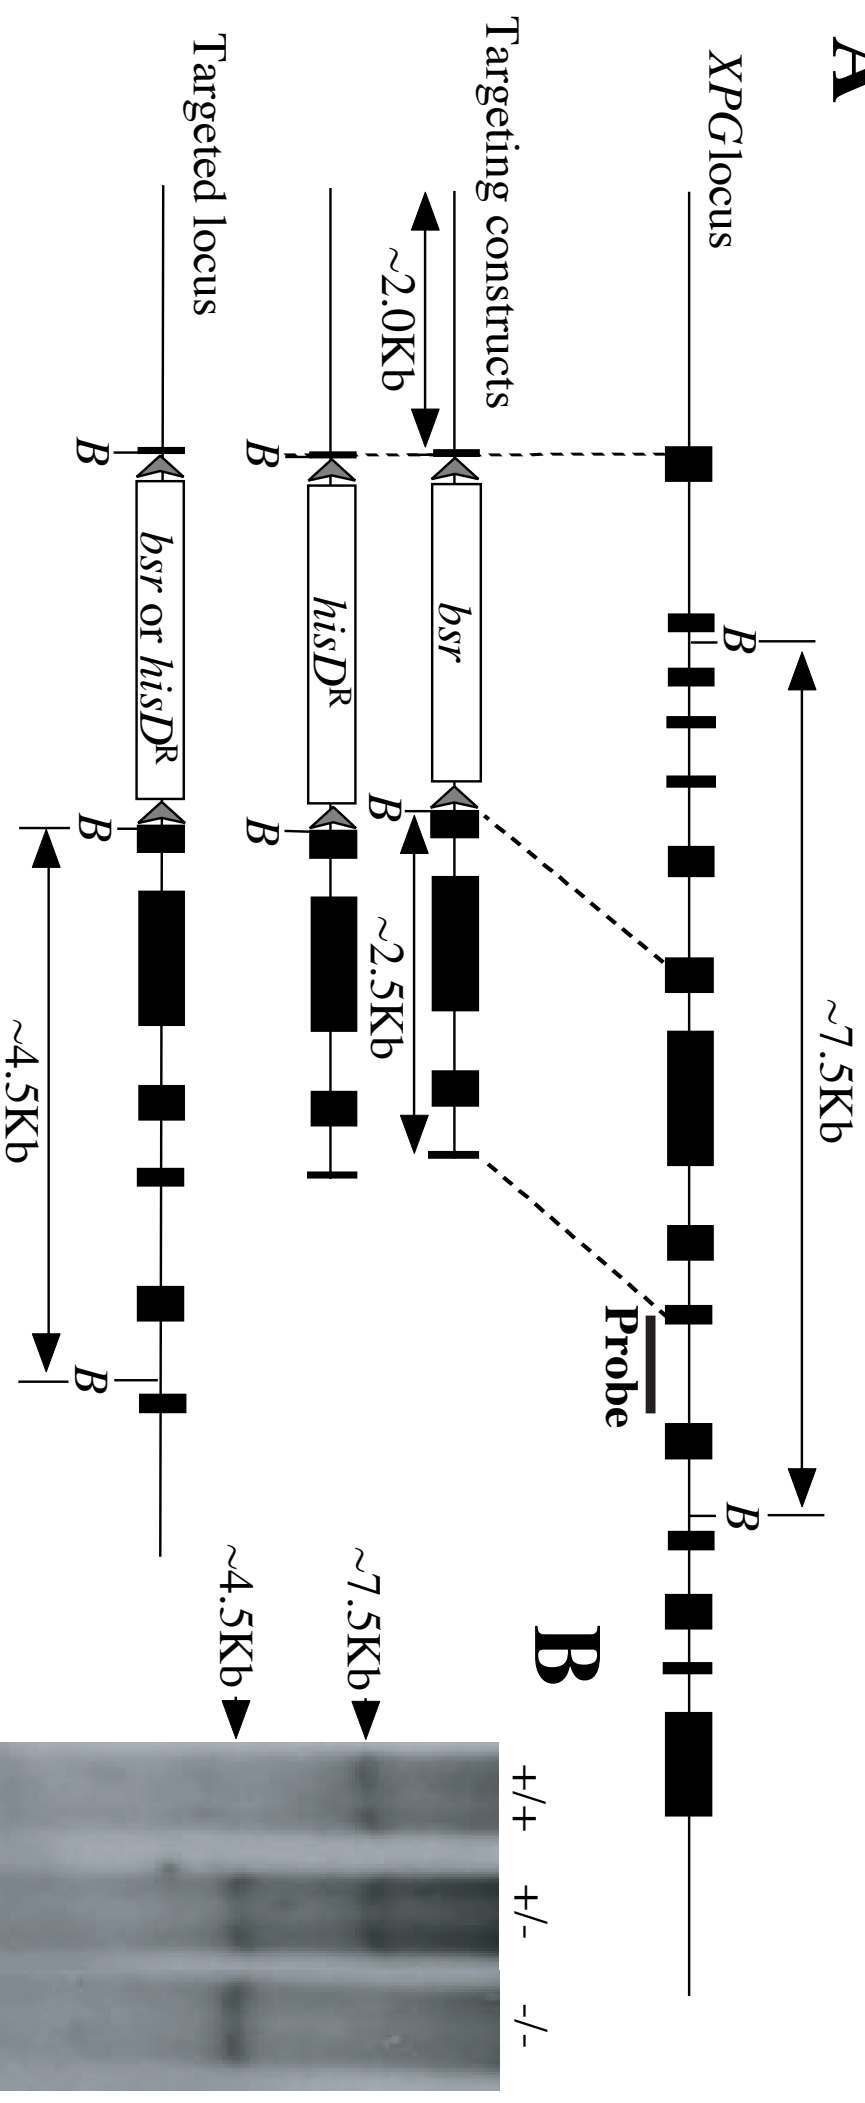

Supplement: molcellb_25_16_6948__1.pdf [file molcellb_25_16_6948__1.pdf]
